# Supplementary material for: Pharmaceutical Cocrystals of Ethenzamide: Molecular Structure Analysis Based on Vibrational Spectra and DFT Calculations
Source: MDPI journal article supplement (doi:10.3390/ijms23158550), 2022-08-01
Supplement: s1 [file s1]

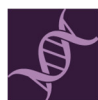

Supporting Information

# Pharmaceutical Cocrystals of Ethenzamide: Molecular Structure Analysis Based on Vibrational Spectra and DFT Calculations

Mei Wan <sup>1</sup>, Jiyuan Fang <sup>1</sup>, Jiadan Xue <sup>2</sup>, Jianjun Liu <sup>1</sup>, Jianyuan Qin <sup>1</sup>, Zhi Hong <sup>1</sup>, Jiusheng Li <sup>1</sup> and Yong Du <sup>1,\*</sup>

<sup>1</sup> Centre for THz Research, China Jiliang University, Hangzhou 310018, China; wm1315286544@163.com (M.W.); jiyuanfang@foxmail.com (J.F.); jianjun@cjl.u.edu.cn (J.L.); jyqin@cjl.u.edu.cn (J.Q.); hongzhi@cjl.u.edu.cn (Z.H.); lijsh@cjl.u.edu.cn (J.L.)

<sup>2</sup> Department of Chemistry, Zhejiang Sci-Tech University, Hangzhou 310018, China; jenniexue@126.com

\* Correspondence: yongdu@cjl.u.edu.cn; Tel.: +86-571-8687-5618

## Table of Contents

|                                                                                                                  |          |
|------------------------------------------------------------------------------------------------------------------|----------|
| Figure S1. Vibrational modes of ETZ-GA cocrystal at position of (a) 0.93 THz and (b) 1.50 THz.                   | Page S2  |
| Figure S2. Vibrational modes of ETZ-26DHBA cocrystal at position of (a) 0.38 THz, (b) 1.14 THz and (c) 1.38 THz. | Page S3  |
| Figure S3. Vibrational modes of ETZ-24DHBA cocrystal at position of (a) 0.68 THz, (b) 0.93 THz and (c) 1.50 THz. | Page S4  |
| Table S1. Comparisons of experimental and simulated THz spectral data of the ETZ cocrystals.                     | Page S5  |
| Table S2. Total electronic energies of the ETZ cocrystals from DFT structure simulations.                        | Page S6  |
| Table S3. Comparisons of experimental and simulated Raman spectral data of the ETZ-GA co-crystal.                | Page S7  |
| Table S4. Comparisons of experimental and simulated Raman spectral data of the ETZ-26DHBA cocrystal.             | Page S8  |
| Table S5. Comparisons of experimental and simulated Raman spectral data of the ETZ-24DHBA cocrystal.             | Page S9  |
| Table S6. Vibrational modes for characteristic peaks of the ETZ-GA cocrystal in Raman spectra.                   | Page S10 |
| Table S7. Vibrational modes for characteristic peaks of the ETZ-26DHBA cocrystal in Raman spectra.               | Page S11 |
| Table S8. Vibrational modes for characteristic peaks of the ETZ-24DHBA cocrystal in Raman spectra.               | Page S12 |

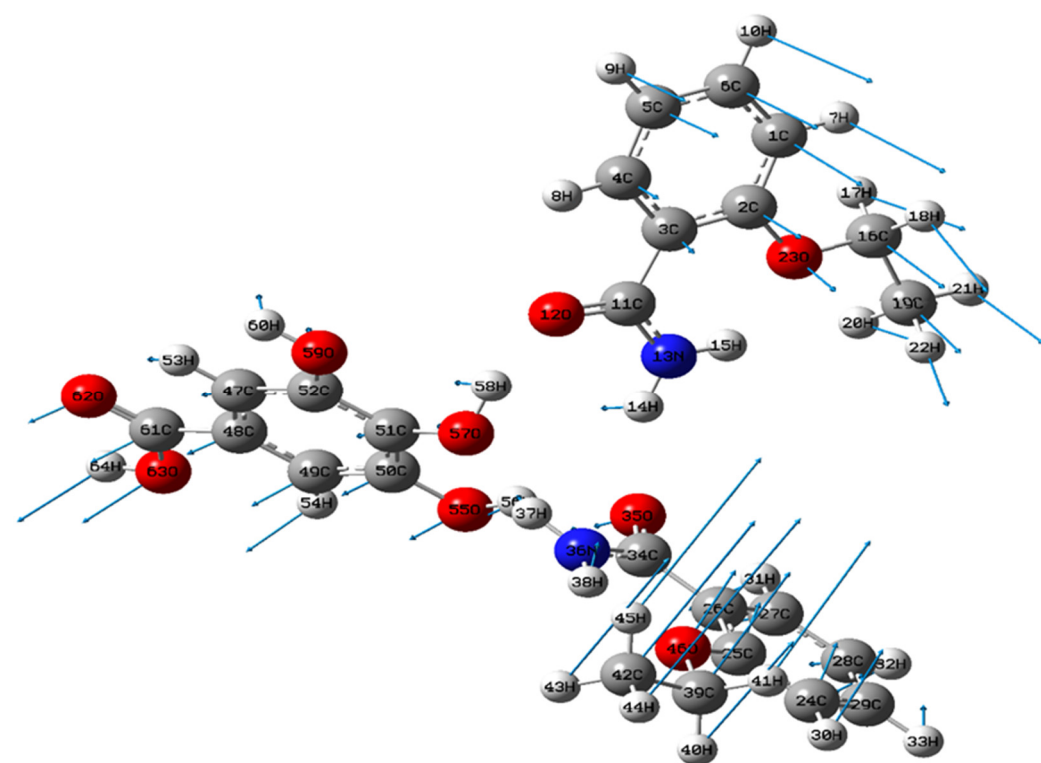

(a) 0.93 THz

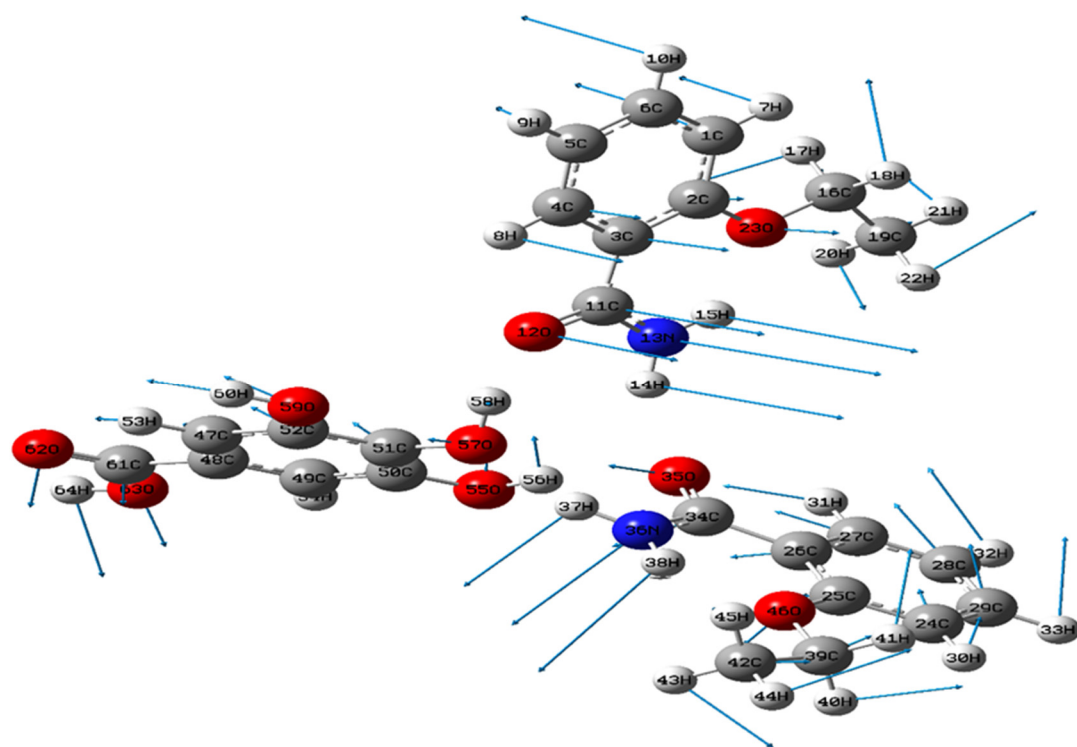

(b) 1.50 THz

**Figure S1.** Vibrational modes of ETZ-GA cocrystal at position of (a) 0.93 THz and (b) 1.50 THz.

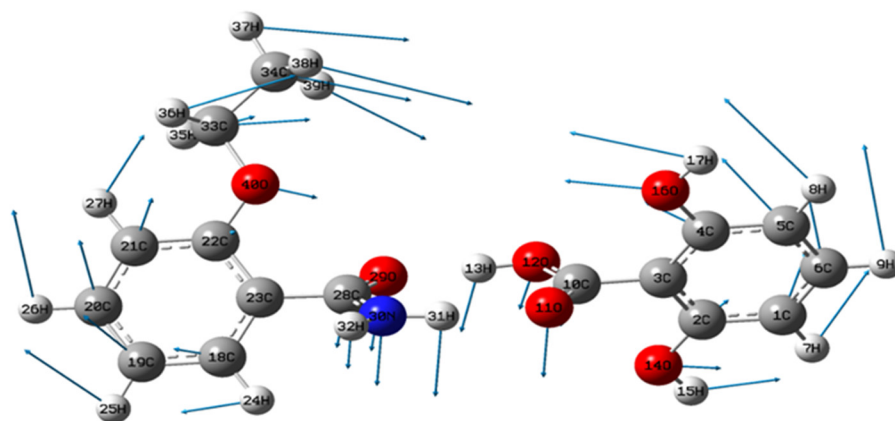

(a) 0.38 THz

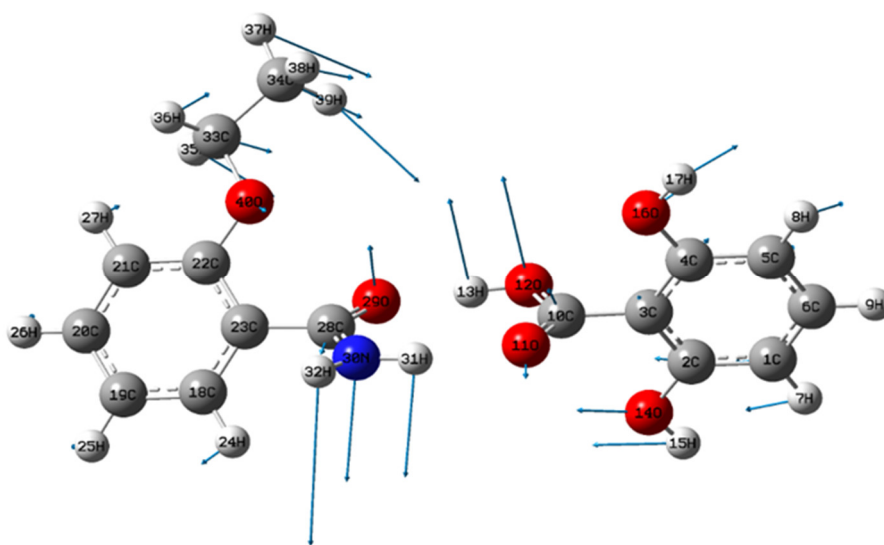

(b) 1.14 THz

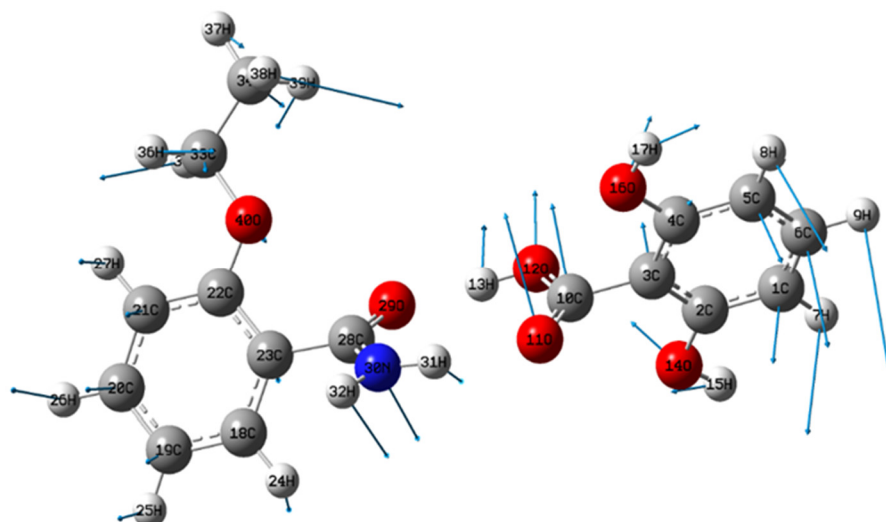

(c) 1.38 THz

**Figure S2.** Vibrational modes of ETZ-26DHBA cocrystal at position of (a) 0.38 THz, (b) 1.14 THz and (c) 1.38 THz.

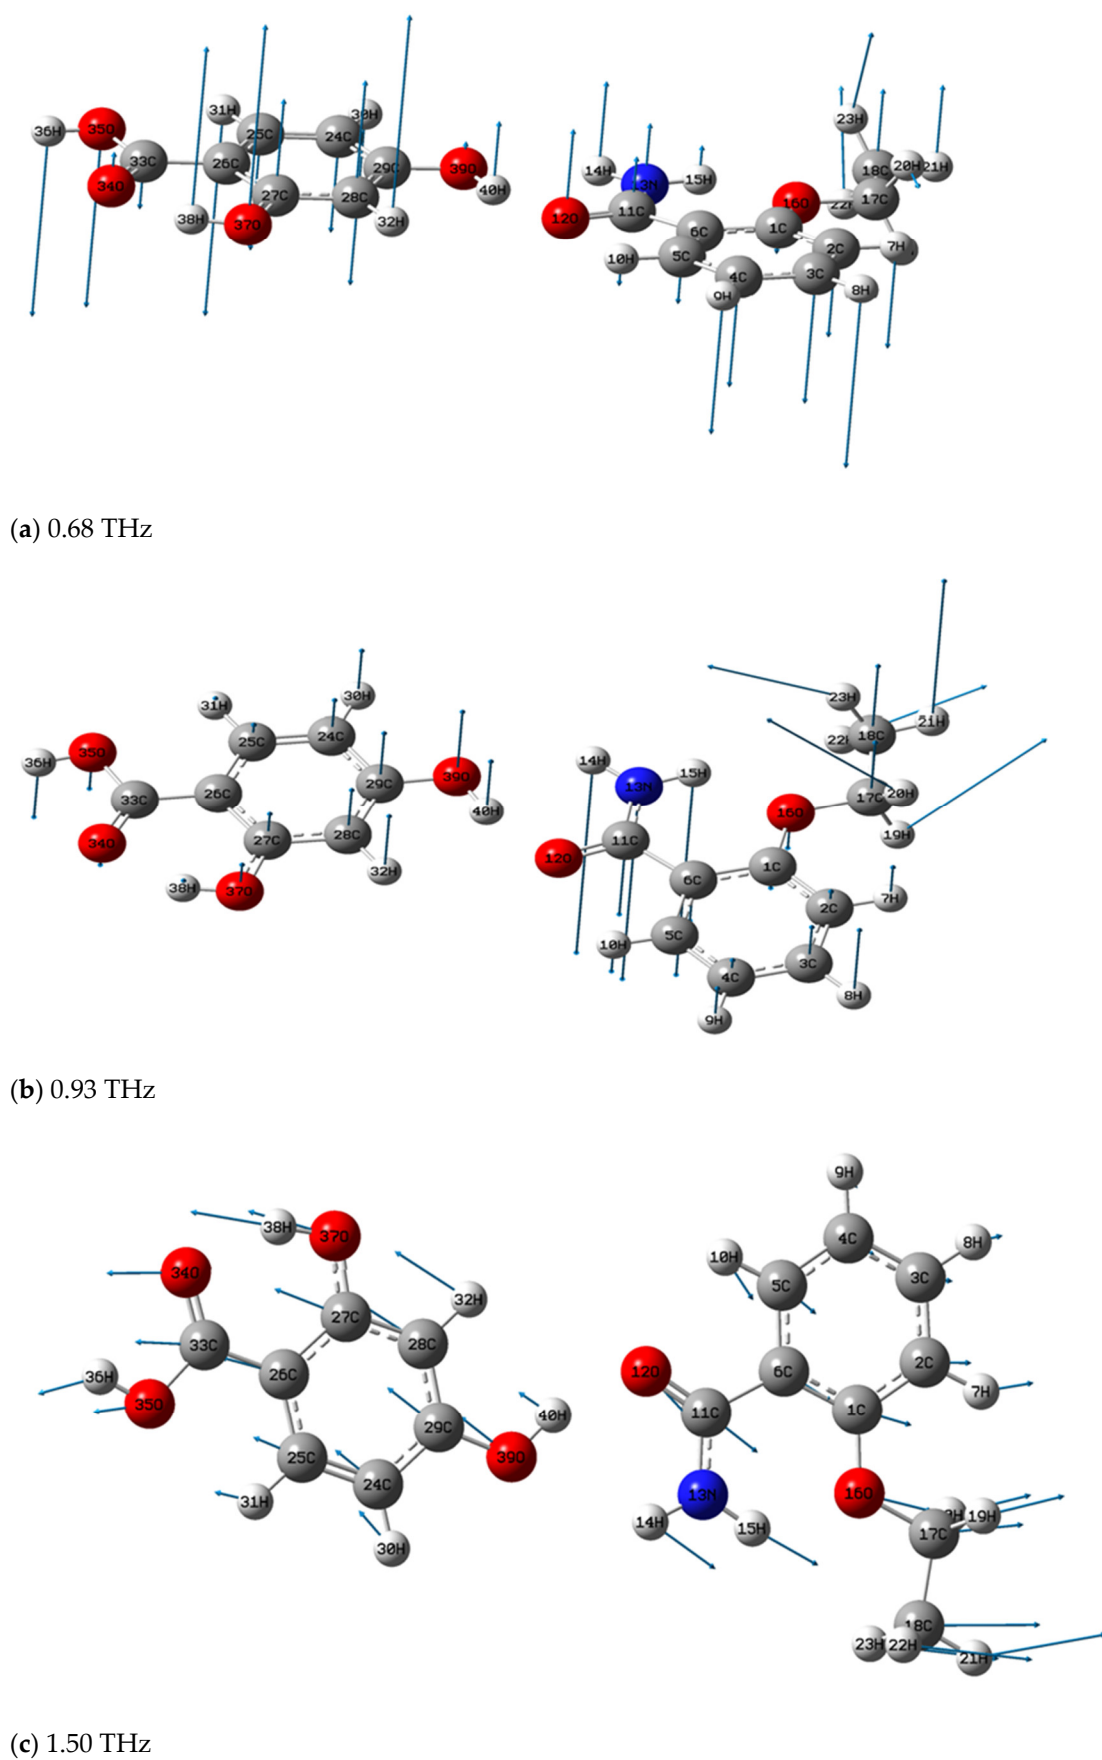

**Figure S3.** Vibrational modes of ETZ-24DHBA cocrystal at position of (a) 0.68 THz, (b) 0.93 THz and (c) 1.50 THz.

**Table S1.** Comparisons of experimental and simulated THz spectral data of the ETZ cocrystals.

| Cocrystal  | Experimental<br>f/THz | Theoretical<br>form I<br>f/THz | Percent error | Theoretical<br>form II<br>f/THz | Percent error |
|------------|-----------------------|--------------------------------|---------------|---------------------------------|---------------|
| ETZ-GA     | 1.02                  | 0.93                           | -8.82%        | 0.88                            | -13.73%       |
|            | 1.46                  | —                              | —             | 1.41                            | -3.42%        |
|            | 1.53                  | 1.50                           | -1.96%        | —                               | —             |
| ETZ-26DHBA | 0.36                  | 0.38                           | 5.56%         | 0.44                            | 22.22%        |
|            | 1.18                  | 1.14                           | -3.39%        | 1.21                            | 2.54%         |
|            | 1.39                  | 1.38                           | -0.72%        | —                               | —             |
| ETZ-24DHBA | 0.74                  | 0.55                           | -25.68%       | 0.68                            | -8.11%        |
|            | 0.93                  | 0.90                           | -3.23%        | 0.93                            | 0.00%         |
|            | 1.20                  | —                              | —             | —                               | —             |
|            | 1.55                  | —                              | —             | 1.50                            | -3.23%        |

**Table S2.** Total electronic energies of the ETZ cocrystals from DFT structure simulations.

| Cocrystal  | Theoretical form | Total electronic energy (hartree) |
|------------|------------------|-----------------------------------|
| ETZ-GA     | form I           | -1756.6418                        |
|            | form II          | -1756.6365                        |
| ETZ-26DHBA | form I           | -1126.4120                        |
|            | form II          | -1266.4040                        |
| ETZ-24DHBA | form I           | -1126.4155                        |
|            | form II          | -1126.4331                        |

**Table S3.** Comparisons of experimental and simulated Raman spectral data of the ETZ-GA cocrystal.

| Experimental<br>Wavenumber/cm <sup>-1</sup> | Theoretical                           | Percent Error | Theoretical                            | Percent Error |
|---------------------------------------------|---------------------------------------|---------------|----------------------------------------|---------------|
|                                             | Form I<br>Wavenumber/cm <sup>-1</sup> |               | Form II<br>Wavenumber/cm <sup>-1</sup> |               |
| 268                                         | 262                                   | -2.24%        | 258                                    | -3.73%        |
| 345                                         | 327                                   | -5.22%        | 331                                    | -4.06%        |
| 384                                         | 381                                   | -0.78%        | 377                                    | -1.82%        |
| 426                                         | 428                                   | 0.47%         | 428                                    | 0.47%         |
| 550                                         | 539                                   | -2.00%        | 543                                    | -1.27%        |
| 615                                         | 632                                   | 2.76%         | 628                                    | 2.11%         |
| 654                                         | 671                                   | 2.60%         | 671                                    | 2.60%         |
| 704                                         | 694                                   | -1.42%        | 682                                    | -3.13%        |
| 754                                         | 763                                   | 1.19%         | 767                                    | 1.72%         |
| 793                                         | 790                                   | -0.38%        | 790                                    | -0.38%        |
| 820                                         | 825                                   | 0.61%         | 833                                    | 1.59%         |
| 928                                         | 937                                   | 0.97%         | 941                                    | 1.40%         |
| 966                                         | 960                                   | -0.62%        | 964                                    | -0.21%        |
| 1051                                        | 1072                                  | 2.00%         | 1076                                   | 2.38%         |
| 1093                                        | 1106                                  | 1.19%         | 1110                                   | 1.56%         |
| 1120                                        | 1145                                  | 2.23%         | 1149                                   | 2.59%         |
| 1167                                        | 1172                                  | 0.43%         | 1176                                   | 0.77%         |
| 1240                                        | 1253                                  | 1.05%         | 1253                                   | 1.05%         |
| 1263                                        | 1299                                  | 2.85%         | 1303                                   | 3.17%         |
| 1309                                        | 1330                                  | 1.60%         | 1334                                   | 1.91%         |
| 1375                                        | 1365                                  | -0.73%        | 1361                                   | -1.02%        |
| 1421                                        | 1396                                  | -1.76%        | 1403                                   | -1.27%        |
| 1460                                        | 1484                                  | 1.64%         | 1488                                   | 1.92%         |
| 1533                                        | 1562                                  | 1.89%         | 1558                                   | 1.63%         |
| 1606                                        | 1596                                  | -0.62%        | 1600                                   | -0.37%        |
| 1633                                        | 1635                                  | 0.12%         | 1635                                   | 0.12%         |
| 1687                                        | 1673                                  | -0.83%        | 1670                                   | -1.01%        |
| 1745                                        | 1743                                  | -0.11%        | 1739                                   | -0.34%        |
|                                             | RMSE                                  | 15.83         | RMSE                                   | 17.30         |

RMSE: root mean square error.

**Table S4.** Comparisons of experimental and simulated Raman spectral data of the ETZ-26DHBA cocrystal.

| Experimental<br>Wavenumber/cm <sup>-1</sup> | Theoretical<br>Form I<br>Wavenumber/cm <sup>-1</sup> | Percent error | Theoretical<br>form II<br>wavenumber/cm <sup>-1</sup> | Percent Error |
|---------------------------------------------|------------------------------------------------------|---------------|-------------------------------------------------------|---------------|
| 256                                         | 227                                                  | -11.33%       | 227                                                   | -11.33%       |
| 291                                         | 262                                                  | -9.97%        | 250                                                   | -14.09%       |
| 345                                         | 327                                                  | -5.22%        | 316                                                   | -8.41%        |
| 403                                         | 370                                                  | -8.19%        | 339                                                   | -15.88%       |
| 434                                         | 420                                                  | -3.23%        | 431                                                   | -0.69%        |
| 565                                         | 536                                                  | -5.13%        | 543                                                   | -3.89%        |
| 600                                         | 597                                                  | -0.50%        | 597                                                   | -0.50%        |
| 708                                         | 736                                                  | 3.95%         | 736                                                   | 3.95%         |
| 754                                         | 763                                                  | 1.19%         | 763                                                   | 1.19%         |
| 827                                         | 825                                                  | -0.24%        | 825                                                   | -0.24%        |
| 931                                         | 941                                                  | 1.07%         | 937                                                   | 0.64%         |
| 1059                                        | 1068                                                 | 0.85%         | 1110                                                  | 4.82%         |
| 1120                                        | 1133                                                 | 1.16%         | 1153                                                  | 2.95%         |
| 1163                                        | 1180                                                 | 1.46%         | 1180                                                  | 1.46%         |
| 1201                                        | 1214                                                 | 1.08%         | 1211                                                  | 0.83%         |
| 1286                                        | 1280                                                 | -0.47%        | 1249                                                  | -2.88%        |
| 1307                                        | 1307                                                 | 0.00%         | 1311                                                  | 0.31%         |
| 1363                                        | 1361                                                 | -0.15%        | 1361                                                  | -0.15%        |
| 1390                                        | 1415                                                 | 1.80%         | 1423                                                  | 2.37%         |
| 1464                                        | 1492                                                 | 1.91%         | 1492                                                  | 1.91%         |
| 1541                                        | 1530                                                 | -0.71%        | 1596                                                  | 3.57%         |
| 1603                                        | 1616                                                 | 0.81%         | 1619                                                  | 1.00%         |
| 1649                                        | 1639                                                 | -0.61%        | 1646                                                  | -0.18%        |
| 1695                                        | 1704                                                 | 0.53%         | 1689                                                  | -0.35%        |
| 1745                                        | 1751                                                 | 0.34%         | 1751                                                  | 0.34%         |
|                                             | RMSE                                                 | 17.63         | RMSE                                                  | 27.98         |

RMSE: root mean square error.



**Table S5.** Comparisons of experimental and simulated Raman spectral data of the ETZ-24DHBA cocrystal.

| Experimental<br>wavenumber / $\text{cm}^{-1}$ | Theoretical<br>form I<br>wavenumber / $\text{cm}^{-1}$ | Percent error | Theoretical<br>form II<br>wavenumber / $\text{cm}^{-1}$ | Percent error |
|-----------------------------------------------|--------------------------------------------------------|---------------|---------------------------------------------------------|---------------|
| 276                                           | 277                                                    | 0.36%         | 281                                                     | 1.81%         |
| 299                                           | 308                                                    | 3.01%         | 312                                                     | 4.35%         |
| 334                                           | 335                                                    | 0.30%         | 339                                                     | 1.50%         |
| 384                                           | 385                                                    | 0.26%         | 385                                                     | 0.26%         |
| 418                                           | 416                                                    | -0.48%        | 420                                                     | 0.48%         |
| 480                                           | 439                                                    | -8.54%        | 454                                                     | -5.42%        |
| 526                                           | 524                                                    | -0.38%        | 539                                                     | 2.47%         |
| 611                                           | 547                                                    | -10.47%       | 617                                                     | 0.98%         |
| 638                                           | 632                                                    | -0.94%        | 632                                                     | -0.94%        |
| 754                                           | 694                                                    | -7.96%        | 763                                                     | 1.19%         |
| 781                                           | 759                                                    | -2.82%        | 786                                                     | 0.64%         |
| 823                                           | 825                                                    | 0.24%         | 825                                                     | 0.24%         |
| 928                                           | 937                                                    | 0.97%         | 937                                                     | 0.97%         |
| 978                                           | 998                                                    | 2.04%         | 995                                                     | 1.74%         |
| 1051                                          | 1072                                                   | 2.00%         | 1072                                                    | 2.00%         |
| 1093                                          | 1110                                                   | 1.56%         | 1110                                                    | 1.56%         |
| 1159                                          | 1137                                                   | -1.90%        | 1141                                                    | -1.55%        |
| 1194                                          | 1211                                                   | 1.42%         | 1180                                                    | -1.17%        |
| 1236                                          | 1249                                                   | 1.05%         | 1199                                                    | -2.99%        |
| 1271                                          | 1303                                                   | 2.52%         | 1249                                                    | -1.73%        |
| 1333                                          | 1353                                                   | 1.50%         | 1338                                                    | 0.38%         |
| 1398                                          | 1400                                                   | 0.14%         | 1396                                                    | -0.14%        |
| 1464                                          | 1492                                                   | 1.91%         | 1492                                                    | 1.91%         |
| 1556                                          | 1623                                                   | 4.31%         | 1546                                                    | -0.64%        |
| 1595                                          | 1654                                                   | 3.70%         | 1616                                                    | 1.32%         |
| 1637                                          | 1688                                                   | 3.12%         | 1662                                                    | 1.53%         |
| 1726                                          | 1750                                                   | 1.39%         | 1712                                                    | -0.81%        |
|                                               | RMSE                                                   | 30.73         | RMSE                                                    | 15.98         |

RMSE: root mean square error.

**Table S6.** Vibrational modes for characteristic peaks of the ETZ-GA cocrystal in Raman spectra.

| Mode       | Theoretical<br>wavenumber / $\text{cm}^{-1}$ | Experimental<br>wavenumber / $\text{cm}^{-1}$ | Mode assignment                                                                    |
|------------|----------------------------------------------|-----------------------------------------------|------------------------------------------------------------------------------------|
| $\nu_1$    | 262                                          | 268(w)                                        | $\rho(\text{H17-C16-H18, O12=C11-N13-H14})$                                        |
| $\nu_2$    | 327                                          | 345(w)                                        | $\delta(\text{O62=C61-O63-H64}), \rho(\text{H37-N36-H38, H40-C39-H41})$            |
| $\nu_3$    | 381                                          | 384(w)                                        | Def(R2), $\rho(\text{H37-N36-H38, H40-C39-H41})$                                   |
| $\nu_4$    | 428                                          | 426(m)                                        | Def(R2), Def(R3), $\rho(\text{O62=C61-O63-H64})$                                   |
| $\nu_5$    | 539                                          | 550(m)                                        | $\omega(\text{H15-N13-C11, H37-N36-H38}), \text{Def(R1)}$                          |
| $\nu_6$    | 632                                          | 615(w)                                        | $\rho(\text{H37-N36-H38, H14-N13-H15}), \text{Def(R2)}$                            |
| $\nu_7$    | 671                                          | 654(m)                                        | $\delta(\text{O62=C61-O63-H64}), \text{Def(R3)}$                                   |
| $\nu_8$    | 694                                          | 704(m)                                        | $\tau(\text{H14-N13-H15}), \text{Def(R1)}$                                         |
| $\nu_9$    | 763                                          | 754(w)                                        | Def(R2), $\rho(\text{H14-N13-H15, H37-N36-H38})$                                   |
| $\nu_{10}$ | 790                                          | 793(s)                                        | Def(R3), $\delta(\text{O62=C61-O63-H64}), \rho(\text{H37-N36-H38})$                |
| $\nu_{11}$ | 825                                          | 820(s)                                        | $\rho(\text{H37-N36-H38, H40-C39-H41}), \text{Def(R2)}$                            |
| $\nu_{12}$ | 937                                          | 928(w)                                        | Def(R2), $\rho(\text{H37-N36-H38, H40-C39-H41})$                                   |
| $\nu_{13}$ | 960                                          | 966(vw)                                       | Def(R3), $\delta(\text{O62=C61-O63-H64})$                                          |
| $\nu_{14}$ | 1072                                         | 1051(m)                                       | Def(R2)                                                                            |
| $\nu_{15}$ | 1106                                         | 1093(m)                                       | Def(R1), $\rho(\text{H14-N13-H15})$                                                |
| $\nu_{16}$ | 1145                                         | 1120(m)                                       | $\rho(\text{H14-N13-H15, H37-N36-H38})$                                            |
| $\nu_{17}$ | 1172                                         | 1167(m)                                       | $\rho(\text{H37-N36-H38}), \text{Def(R2)}$                                         |
| $\nu_{18}$ | 1253                                         | 1240(w)                                       | Def(R2), $\rho(\text{H37-N36-H38}), \theta(\text{C25-O46})$                        |
| $\nu_{19}$ | 1299                                         | 1263(s)                                       | Def(R1), $\rho(\text{H14-N13-H15, H37-N36-H38})$                                   |
| $\nu_{20}$ | 1330                                         | 1309(s)                                       | Def(R2)                                                                            |
| $\nu_{21}$ | 1365                                         | 1375(s)                                       | $\delta(\text{H37-N36-H38}), \text{Def(R3)}$                                       |
| $\nu_{22}$ | 1396                                         | 1421(w)                                       | Def(R3), $\delta(\text{O62=C61-O63-H64})$                                          |
| $\nu_{23}$ | 1484                                         | 1460(m)                                       | Def(R2), $\delta(\text{H40-C39-H41})$                                              |
| $\nu_{24}$ | 1562                                         | 1533(m)                                       | Def(R3), $\rho(\text{O62=C61-O63-H64})$                                            |
| $\nu_{25}$ | 1596                                         | 1606(s)                                       | $\theta(\text{C34=O35}), \text{Def(R2)}, \delta(\text{H14-N13-H15, H37-N36-H38})$  |
| $\nu_{26}$ | 1635                                         | 1633(s)                                       | $\theta(\text{C11=O12}), \text{Def(R1)}, \text{Def(R3)}, \rho(\text{H37-N36-H38})$ |
| $\nu_{27}$ | 1673                                         | 1687(m)                                       | $\theta(\text{C34=O35}), \delta(\text{H14-N13-H15, H37-N36-H38})$                  |
| $\nu_{28}$ | 1743                                         | 1745(m)                                       | $\theta(\text{C61=O62}), \text{Def(R3)}$                                           |

Vw-very weak, w-weak, m-medium, s-strong,  $\theta$ -stretching,  $\rho$ -in-plane rocking vibration,  $\delta$ -scissor,  $\omega$ -out of plane rocking vibration,  $\tau$ -torsion, Def-Deformation.

**Table S7.** Vibrational modes for characteristic peaks of the ETZ-26DHBA cocrystal in Raman spectra.

| Mode       | Theoretical wavenumber / $\text{cm}^{-1}$ | Experimental wavenumber / $\text{cm}^{-1}$ | Mode assignment                                                                                       |
|------------|-------------------------------------------|--------------------------------------------|-------------------------------------------------------------------------------------------------------|
| $\nu_1$    | 227                                       | 256(m)                                     | $\tau(\text{H31-N30-H32})$ , $\rho(\text{O11=C10-O12-H13})$ , $\omega(\text{O29=C28-N30-H31})$        |
| $\nu_2$    | 262                                       | 291(m)                                     | $\rho(\text{H31-N30-H32})$ , $\text{O11=C10-O12-H13}$ , $\text{H35-C33-H36}$                          |
| $\nu_3$    | 327                                       | 345(w)                                     | Def(R1), $\rho(\text{O11=C10-O12-H13})$ , $\text{H35-C33-H36}$                                        |
| $\nu_4$    | 370                                       | 403(m)                                     | Def(R1), $\rho(\text{H31-N30-H32})$ , $\text{H35-C33-H36}$                                            |
| $\nu_5$    | 420                                       | 434(m)                                     | $\rho(\text{O11=C10-O12-H13})$ , Def(R2), $\delta(\text{O34=C33-O35-H36})$ , $\text{H26-C20=C21-H27}$ |
| $\nu_6$    | 536                                       | 565(m)                                     | $\rho(\text{O11=C10-O12-H13})$ , Def(R2)                                                              |
| $\nu_7$    | 597                                       | 600(m)                                     | $\delta(\text{O11=C10-O12-H13})$ , Def(R2)                                                            |
| $\nu_8$    | 736                                       | 708(m)                                     | Def(R2), $\delta(\text{O11=C10-O12-H13})$ , $\rho(\text{H31-N30-H32})$                                |
| $\nu_9$    | 763                                       | 754(s)                                     | Def(R1), $\rho(\text{H31-N30-H32})$                                                                   |
| $\nu_{10}$ | 825                                       | 827(w)                                     | Def(R1), $\delta(\text{O11=C10-O12-H13})$ , $\rho(\text{H31-N30-H32})$                                |
| $\nu_{11}$ | 941                                       | 931(w)                                     | Def(R1), $\rho(\text{H35-C33-H36})$                                                                   |
| $\nu_{12}$ | 1068                                      | 1059(s)                                    | Def(R1)                                                                                               |
| $\nu_{13}$ | 1133                                      | 1120(m)                                    | $\rho(\text{H31-N30-H32})$ , $\text{H35-C33-H36}$ , $\delta(\text{H24-C18=C19-H25})$                  |
| $\nu_{14}$ | 1180                                      | 1163(s)                                    | $\delta(\text{H7-C1=C6-H9})$ , $\text{H8-C5=C6-H9}$                                                   |
| $\nu_{15}$ | 1214                                      | 1201(m)                                    | Def(R2), $\theta(\text{C10=O12})$                                                                     |
| $\nu_{16}$ | 1280                                      | 1286(s)                                    | $\theta(\text{C22-O40})$ , Def(R1)                                                                    |
| $\nu_{17}$ | 1307                                      | 1307(m)                                    | $\rho(\text{H26-C20=C21-H27})$ , $\text{H24-C18=C19-H25}$ , $\text{H35-C33-H36}$                      |
| $\nu_{18}$ | 1361                                      | 1363(w)                                    | Def(R2)                                                                                               |
| $\nu_{19}$ | 1415                                      | 1390(w)                                    | Def(R1), $\delta(\text{H31-N30-C28})$                                                                 |
| $\nu_{20}$ | 1492                                      | 1464(w)                                    | $\theta(\text{C2-O14})$ , $\text{C4-O16}$ , Def(R2)                                                   |
| $\nu_{21}$ | 1530                                      | 1541(m)                                    | $\delta(\text{H35-C33-H36})$ , Def(R1)                                                                |
| $\nu_{22}$ | 1616                                      | 1603(s)                                    | $\delta(\text{H31-N30-H32})$ , Def(R1), $\theta(\text{C28=O29})$                                      |
| $\nu_{23}$ | 1639                                      | 1649(m)                                    | $\delta(\text{H31-N30-H32})$ , Def(R1)                                                                |
| $\nu_{24}$ | 1704                                      | 1695(vw)                                   | $\theta(\text{C28=O29})$ , $\text{C10=O11}$ , $\delta(\text{H31-N30-H32})$                            |
| $\nu_{25}$ | 1751                                      | 1745(vw)                                   | $\theta(\text{C28=O29})$ , $\text{C10=O11}$ , $\rho(\text{H31-N30-H32})$                              |

Vw-very weak, w-weak, m-medium, s-strong,  $\theta$ -stretching,  $\rho$ -in-plane rocking vibration,  $\delta$ -scissor,  $\omega$ -out of plane rocking vibration,  $\tau$ -torsion, Def-Deformation.

**Table S8.** Vibrational modes for characteristic peaks of the ETZ-24DHBA cocrystal in Raman spectra.

| Mode       | Theoretical<br>wavenumber / $\text{cm}^{-1}$ | Experimental<br>wavenumber / $\text{cm}^{-1}$ | Mode assignment                                                                                    |
|------------|----------------------------------------------|-----------------------------------------------|----------------------------------------------------------------------------------------------------|
| $\nu_1$    | 281                                          | 276(w)                                        | $\delta(\text{C11-C6=C1, C33-C26=C1})$                                                             |
| $\nu_2$    | 312                                          | 299(w)                                        | $\rho(\text{H15-N13-H14, H20-C17-H19, H23-C18-H22})$                                               |
| $\nu_3$    | 339                                          | 334(w)                                        | $\rho(\text{H20-C17-H19, H23-C18-H22}), \text{Def(R1)}, \delta(\text{C33-C26=C1})$                 |
| $\nu_4$    | 385                                          | 384(m)                                        | $\delta(\text{O34=C33-O35-H36, C11-C6=C5}), \text{Def(R1)}, \rho(\text{H15-N13-H14, H23-C18-H22})$ |
| $\nu_5$    | 420                                          | 418(m)                                        | $\rho(\text{O34=C33-O35-H36, H20-C17-H19, H23-C18-H22}), \text{Def(R2)}$                           |
| $\nu_6$    | 454                                          | 480(w)                                        | $\rho(\text{O34=C33-O35-H36}), \delta(\text{C11-C6=C5}), \text{Def(R1)}$                           |
| $\nu_7$    | 539                                          | 526(m)                                        | $\rho(\text{H15-N13-H14}), \delta(\text{O34=C33-O35-H36}), \text{Def(R1)}$                         |
| $\nu_8$    | 617                                          | 611(m)                                        | $\rho(\text{C11-C6=C1}), \delta(\text{O34=C33-O35-H36}), \text{Def(R1)},$                          |
| $\nu_9$    | 632                                          | 638(w)                                        | $\text{Def(R2)}, \rho(\text{H15-N13-H14})$                                                         |
| $\nu_{10}$ | 763                                          | 754(s)                                        | $\text{Def(R1)}, \delta(\text{O34=C33-O35-H36})$                                                   |
| $\nu_{11}$ | 786                                          | 781(s)                                        | $\omega(\text{H8-C3=C2-H7, O12=C11-C6}), \tau(\text{H15-N13-C11})$                                 |
| $\nu_{12}$ | 825                                          | 823(w)                                        | $\rho(\text{H15-N13-H14}), \text{Def(R2)}$                                                         |
| $\nu_{13}$ | 937                                          | 928(vw)                                       | $\text{Def(R2)}$                                                                                   |
| $\nu_{14}$ | 995                                          | 978(m)                                        | $\text{Def(R1)}$                                                                                   |
| $\nu_{15}$ | 1072                                         | 1051(m)                                       | $\text{Def(R2)}$                                                                                   |
| $\nu_{16}$ | 1110                                         | 1093(m)                                       | $\rho(\text{H15-N13-H14}), \text{Def(R2)}$                                                         |
| $\nu_{17}$ | 1141                                         | 1159(m)                                       | $\rho(\text{H15-N13-H14})$                                                                         |
| $\nu_{18}$ | 1180                                         | 1194(w)                                       | $\omega(\text{O16-C17-C18}), \rho(\text{H20-C17-H19})$                                             |
| $\nu_{19}$ | 1199                                         | 1236(s)                                       | $\rho(\text{H31-C25=C24-H30, C33-C26=C27})$                                                        |
| $\nu_{20}$ | 1249                                         | 1271(s)                                       | $\theta(\text{C1-O16}), \text{Def(R2)}, \delta(\text{H8-C3=C4-H9})$                                |
| $\nu_{21}$ | 1338                                         | 1333(s)                                       | $\rho(\text{H31-C25=C24-H30}), \delta(\text{C33-C26=C27}), \text{Def(R1)}$                         |
| $\nu_{22}$ | 1396                                         | 1398(w)                                       | $\text{Def(R1)}, \delta(\text{C11-N13-H14}), \rho(\text{H8-C3=C4-H9, H31-C25=C24-H30})$            |
| $\nu_{23}$ | 1492                                         | 1464(m)                                       | $\theta(\text{C27-O37}), \rho(\text{H8-C3=C4-H9}), \text{Def(R1)}$                                 |
| $\nu_{24}$ | 1546                                         | 1556(m)                                       | $\text{Def(R1)}, \rho(\text{H31-C25=C24-H30}), \theta(\text{C27=C26})$                             |
| $\nu_{25}$ | 1616                                         | 1595(s)                                       | $\text{Def(R2)}, \delta(\text{H15-N13-H14})$                                                       |
| $\nu_{26}$ | 1662                                         | 1637(s)                                       | $\theta(\text{C25=C24, C28=C27, C33=O34}), \text{Def(R1)}$                                         |
| $\nu_{27}$ | 1712                                         | 1726(m)                                       | $\theta(\text{C33=O34, C11=O12}), \delta(\text{H15-N13-H14})$                                      |

Vw-very weak, w-weak, m-medium, s-strong,  $\theta$ -stretching,  $\rho$ -in-plane rocking vibration,  $\delta$ -scissor,  $\omega$ -out of plane rocking vibration,  $\tau$ -torsion, Def-Deformation.
